1 **Cryo-Electron Tomography 3D Structure and Nanoscale Model of *Arabidopsis***  
2 ***thaliana* Cell Wall**

3 Authors: **Purbasha Sarkar<sup>1, 2, †</sup>, Michal Kowalczyk<sup>1,2,3</sup>, Salil Apte<sup>1</sup>, Edgar G.**  
4 **Yap<sup>1</sup>, Jyotirmoy Das<sup>1</sup>, Paul D. Adams<sup>1,2</sup>, Chandrajit Bajaj<sup>4</sup>, Pablo Guindos<sup>5, 6,</sup>**  
5 **<sup>7</sup>, Manfred Auer<sup>1,2\*</sup>**

6 **Affiliations:**

7 <sup>1</sup>Molecular Biophysics and Integrated Bioimaging Division, Lawrence Berkeley National  
8 Laboratory, Berkeley, CA 94720, USA

9 <sup>2</sup>Joint BioEnergy Institute, Lawrence Berkeley National Laboratory, Berkeley, CA 94720, USA

10 <sup>3</sup>School of Engineering & the Built Environment, Napier University, Edinburgh, UK

11 <sup>4</sup>Department of Computer Science, University of Texas, Austin Texas 78712

12 <sup>5</sup>Department of Structural and Geotechnical Engineering, Pontificia Universidad Católica de  
13 Chile, 4860 Santiago, Chile

14 <sup>6</sup>Department of Engineering and Management of Construction, Pontificia Universidad Católica  
15 de Chile, 4860 Santiago, Chile

16 <sup>7</sup>UC Timber Innovation Center, Pontificia Universidad Católica de Chile, 4860 Santiago, Chile

17

18 \* Correspondence to: [mauer@lbl.gov](mailto:mauer@lbl.gov)

19 † Current address: Reliance Industries Ltd., Navi Mumbai - 400701, India

20

21

22

23 **Abstract:**

24 Using cryo-electron tomography of vitrified sections of one month-old *Arabidopsis thaliana*  
25 inflorescence stem tissue, we visualized primary and secondary cell walls of xylem tissue.  
26 Extensive quantitative and statistical analysis of segmented 3D tomographic data allowed  
27 geometrically idealized 3D-CAD model building of prototypic microfibrils, cross-links, and their  
28 supramolecular microfibril 3D organization. We propose a prototypic microfibril model where a  
29 cellulose core is heavily decorated by a thin sheath of hemicellulose with infrequent but sturdy  
30 hemicellulose-based cross-links. Such prototypic microfibrils then adopt a rather unexpected 3D  
31 supramolecular organization of high order and complexity. We discuss a possible new role for  
32 lignin in plant cell walls at low concentrations with lignin not acting as a matrix but rather as a  
33 reinforcement of microfibrils and cross-links. Extensive computational simulations of  
34 mechanical properties further revealed that this 3D organization of the cell wall is not optimized  
35 for load bearing but instead for flexibility and ductility.

36

37 **One Sentence Summary:**

38 Cryo-electron tomography and mechanical simulations revealed cell wall 3D architecture,  
39 optimized for flexibility/ductility.

40

41 Cell walls provide mechanical strength and protection to plants, while being flexible to  
42 support their growth and development and have been studied for over eight decades (1-6). The  
43 current model of plant cell walls portrays a framework of ~3.5 nm thick cellulose microfibrils,  
44 interconnected by single-strand hemicellulose thus forming a rather loose 3D “long-tether”  
45 network, with hemicellulose adhering to significant stretches of the microfibrils (7-14). Other  
46 prominent cell wall components, pectins are predominantly found in the middle lamella (ML)  
47 adhering two adjacent cells (15), whereas phenolic lignin polymers are thought to form a  
48 hydrophobic matrix in between the cellulose-hemicellulose network (15, 16). The most  
49 commonly discussed cell wall model has microfibrils alternating between two sharply distinct  
50 orientations, not unlike textile fabric (3, 7, 11), however alternative models have been proposed  
51 (1-2, 17-19).

52 Numerical simulation of mechanical properties using approximation techniques such as  
53 the finite element method (20) require realistic 3D cell wall structures and models, and to date  
54 have been based on the assumption of pseudo-random fiber networks (21-23). Model building  
55 allows virtual testing of the different cell wall components and alternative 3D configurations. As  
56 for fiber-reinforced composites, homogenization techniques can be combined with finite element  
57 methods to extract global properties such as stiffness of the wall.

58 Here we used cryo-electron tomography vitreous sections of 1-month old *Arabidopsis*  
59 *thaliana* inflorescence stems (24) to reveal the 3D nano-architecture of microfibrils and their  
60 cross-connectors, as well as the supramolecular 3D organization of primary and secondary walls.  
61 Extensive statistical volumetric analysis and model building, followed by mechanical properties  
62 simulations suggest that the secondary cell walls we examined are not optimized for maximal

63 load bearing but instead for flexibility and ductility with superior load transfer capabilities as  
64 well as elastic and viscoelastic energetic capacities.

65

## 66 **Cell Wall Building Blocks**

67 1-month old *Arabidopsis thaliana* inflorescence stems (Fig. 1A-B) have different cell  
68 wall types (Fig. 1C), including thin xylem parenchyma (XP) cell walls with only primary walls  
69 and thick xylem tracheary (XTE) elements cell walls with both primary and secondary walls.  
70 Figure 1D and 1E show single ~1nm thin slices through 3D reconstruction of vitreous sections of  
71 XP and XTE cell walls cut from self-pressurized, ultra-rapidly frozen young stem segments (24),  
72 with corresponding 3D renderings shown in Fig. 1F and 1G, respectively.

73 Measuring the diameter of individual microfibrils (Fig. 2A, n=150 for each cell wall  
74 type), we observed peaks at  $3.5 \pm 0.5$  nm and at  $5 \pm 0.5$  nm (Fig. 2B), which in accordance with  
75 the current microfibril model, may correspond to a round cellulose core that in many places is  
76 surrounded by a very thin sheath of hemicellulose. Some microfibrils appear elliptical with up to  
77 ~9 nm thicker portions (Fig. 2B-C) that may be assigned to additional hemicellulose, pectin, or  
78 lignin. This assignment was further supported by the experimental removal of pectins and  
79 hemicelluloses (24-25) from primary cell walls (Ext. PCW) by treatments with 0.5% ammonium  
80 oxalate and 4% NaOH prior to dehydration and resin-embedding (Fig. 2B). Cellulose,  
81 hemicellulose and pectin cannot be directly distinguished in the density maps due to their  
82 chemical similarity. We will use the term matrix polychaccarides instead of hemicellulose, since  
83 pectin's contribution to microfibrils and cross-links cannot be ruled out, despite the overall low  
84 pectin concentration and expected localization of pectin to the middle lamella.

85 Statistical analysis of microfibrils and cross-connector thickness allowed a comparison  
86 between the volumes occupied by cellulose and matrix polysaccharides, respectively, and to  
87 build idealized models: one where microfibrils are exclusively made of cellulose, with all matrix  
88 polysaccharides residing in the cross-links only (Fig. 2D) and another scenario where cellulose  
89 strands form a 3.5 nm microfibril core, surrounded by a thin matrix polysaccharides-based sheath  
90 and matrix polysaccharides form sturdy cross-links (Fig. 2E). The matrix polysaccharides-to-  
91 cellulose volume ratio of the first scenario is  $\sim 0.07$  and 1.3 for the second scenario, which is in  
92 good agreement with bulk analysis estimates from *Arabidopsis thaliana* root and leaves (26).  
93 While we realize the limitations of comparison with bulk mass ratio biochemical analysis, our  
94 core-and-sheath model seems more likely, and is agreement with previous findings that  
95 significant stretches of matrix polysaccharide strands are closely aligned with the elementary  
96 fibril cellulose core (9, 10, 12, 27-28). This arrangement would allow hemicellulose sheaths and  
97 cross-links to slide along the cellulose core under shear force, whereas rigid, highly localized  
98 connections would likely break and has significant implications for force transmission between  
99 adjacent microfibril layers as will be discussed below. Bridge-like cross-linkers ( $n=100$  for each  
100 type of cell wall) appeared short (typically 4-6 nm) and thick, indicating bundling of multiple  
101 matrix polysaccharide strands. Within the  $z=50$  nm section-height examined in cryo-tomograms,  
102 we found on average for 4 and 3 out of every 5 microfibrils for PCWs and SCWs, respectively.  
103 Cross-links were absent in chemically extracted PCWs (Fig. 2F).

104

### 105 **Supramolecular 3D Cell Wall Organization**

106 As shown in Figure 3A-B xylem tracheary element (XTE) cells feature multiple layers, with the  
107 middle lamella (M) being sandwiched between primary cell wall layers (P), which are flanked by

108 three secondary cell wall segments (S1, S2, S3) on one side and one (S) secondary cell wall  
109 segment on the other side, with intermittent transition zones (T). Xylem parenchyma (XP) cells  
110 lack secondary cell walls layers (Fig 3C-D). To determine whether texture differences across the  
111 cell wall visible in cryo-EM projection images of XTE cell walls (Fig 3A) could be attributed to  
112 differences in microfibril 3D orientations, we measured the average tilt angle of microfibrils in  
113 consecutive radial microfibril layers . We found in each of the S1, S2 and S3 regions of SCWs  
114 ~15 consecutive parallel microfibril layers (Fig. 3B) that were off-set from axial orientation by  
115 either plus or minus  $\sim 27^\circ$  (with slight variations being present in the tilt angle value for each  
116 microfibril). Between each of the S regions and between the S and P region, we found a three-  
117 layer transition zone (T), where microfibrils were oriented axially. Likewise, in primary cell  
118 walls in both XTE and XP cells (Fig. 3C-D) most microfibrils were oriented axially (parallel to  
119 the growth axis).

120

## 121 **Mechanical Cell Wall Properties**

122 To determine what effect the supramolecular 3D organization had on the mechanical  
123 properties of primary and secondary cell walls, we resorted to computational simulations (Fig.  
124 4). First we examined the mechanical properties of the rather complex tomography-derived 3D  
125 volume of the complex XTE walls (Fig. 4A) and of simplified and idealized 3D-CAD models  
126 (Fig. 4B), which allowed for the calculation of axial load and shear forces for different wall  
127 models. We estimated the overall mechanical stiffness on both the experimentally determined  
128 volumes (Fig. 4C) and CAD-model idealized models (Fig. 4D), using homogenization, as is a  
129 routine approach in composite and porous material research.

## 130 ***Mechanical properties of tomographic cell wall density maps***

131 We assumed a  $300 \times 100 \times 50 \text{ nm}^3$  tomographic representative volume element (RVE) of SCW to  
132 be made of orthotropic material (Supplementary text; Tables S1 and S2), and considered  
133 Young's modulus of 30 and 10 GPa for cellulose and hemicellulose, respectively (21). We found  
134 the effective stiffness of the SCW tomographic volume (SCW-Tomo) to be  $E_R=5.6 \text{ MPa}$ ,  $E_T=25$   
135  $\text{MPa}$  and  $E_L=59 \text{ MPa}$ , along the principal material axes (radial, transverse, longitudinal)  
136 respectively (Fig. 4E). Likewise, we also performed a mechanical analysis of the PCW  
137 tomographic volume (PCW-Tomo), and found the stiffness to be  $E_R=63 \text{ MPa}$ ,  $E_T=161 \text{ MPa}$  and  
138  $E_L=521 \text{ MPa}$  (Fig 4E). We attribute the higher stiffness of the PCW-Tomo compared to the  
139 SCW-Tomo to a smaller void fraction, which was surprisingly large (PCW:  $\sim 72\%$ ; SCW:  
140  $80\%$ ). The void volume is the space not taken up by microfibrils or cross-links, which is likely  
141 filled with water and soluble small molecules. Our cryo-tomographic analysis suggested the  
142 absence of an extensive lignin network matrix, as oligomers or polymers larger than 3 nm should  
143 be visible in our cryo-tomograms. We modeled lignin as ball-like objects ranging from 0.5-3 nm  
144 to be added into the SCW-Tomo volume at various concentrations from 0-30% of the total  
145 volume fraction (Fig. S2 A) and found that at low lignin concentrations there wasn't enough  
146 material to form a continuous matrix, instead lignin may reinforce the cellulose-hemicellulose  
147 macromolecular network, as even small increases in lignin concentrations has significant effects  
148 on the Young moduli, which showed quadratic increases in all directions (Fig. S2G). We submit  
149 that the role of lignin at low concentrations is not to act as a matrix but to reinforce the  
150 microfibril-marix polymer framework, thus enhancing cell wall's overall stiffness.

151

### 152 ***Comparison idealized 3D-CAD model with tomographic density maps***

153 We considered four idealized modeling approaches (see Supplemental material and Fig.  
154 S1) to both primary and secondary cell wall, and chose the NET model for further simulations.

155 The calculated stiffness in SCW-NET ( $E_R=4\text{MPa}$ ,  $E_T=9\text{ MPa}$ ,  $E_L=1520\text{ MPa}$ ) was in good  
156 agreement with the homogenized SCW-Tomo results, except for the stiffness in the axial  
157 direction, which was  $\sim 25$  fold higher (Fig. 4E). This discrepancy led us to an in-depth  
158 examination of microfibril shapes. We realized that microfibrils were not straight rods but had a  
159 wavy appearance, which corresponds to a weakening of the microfibril in the axial direction. To  
160 model such imperfections we introduced a tortuosity (twist) in our idealized microfibril model,  
161 which had a very small influence in the transverse direction ( $E_R=4.5\text{ MPa}$ ,  $E_T=9.2\text{ MPa}$ ), but  
162 resulted in stiffness drop in the axial direction ( $E_L=63\text{ MPa}$ ), bringing it in close agreement with  
163 the SCW-Tomo results in all three directions (Fig. 4E).

164 Nonlinear buckling and viscoelastic analyses of the fibers with and without tortuosity  
165 (Fig. 4F) revealed that that tortuous fibers withstand  $\sim 50$  times lower buckling load compared to  
166 straight fibers (Fig. 4G-H) but can undergo  $\sim 9$ -times larger deformations before collapse and  
167 store up to 43% more elastic energy as they deform. We hence, conclude that imperfections in  
168 microfibril structure, while significantly reducing the stiffness of the cell wall, increases its  
169 ductility as well as the dissipation of elastic and viscoelastic energies, which could be crucial for  
170 plants to prevent breakage against extreme loading (such as in high winds).

### 171 *Supramolecular 3D organization of microfibrils across the cell wall*

172 We further examined the effect of the alternation of microfibril orientation (plus  $27^\circ$  or  
173 minus  $27^\circ$ ) for each of the three 15-microfibril layers in the S1, S2 and S3 SCW and the 3-layer  
174 transition zone in axial microfibril orientation (Fig. S3A). The minus/plus/minus  $27^\circ$  deviation  
175 from an axial orientation caused a dramatic stiffness drop in the axial direction, but also a 200-  
176 fold increase in the elastic strain energy density. Without transition zones (18 layers that are  
177 minus/plus/minus  $27^\circ$  inclined, Fig. S3B), axial stiffness was further reduced by a factor of 4,



178 with an increased elastic energy storage of 30%, whereas if all microfibrils (54 layers) were  
179 inclined by 27° (Fig. S3C), axial stiffness decreased 27-fold and elastic energy storage increased  
180 by 800%. The observed minus/plus/minus configuration is a quasi-symmetric and balanced  
181 composite (each ply has an opposite-aligned counterpart), thus decoupling membrane (in-plane)  
182 and bending (out-of-plane) cell wall mechanical responses (29). This could be vital for plants to  
183 prevent cell deformation during growth and external loading. Spiral spring-like configurations,  
184 e.g. in cylindrical spiral reinforced concrete columns (30), are found in civil, mechanic,  
185 automotive and aerospace engineering for their superior ductility and outstanding energy  
186 absorption capacity of impact loads, mainly due to multiple failure mechanisms (31).

187

188

189

190

## 191 LITERATURE CITED

- 192 1. Van Iterson, G., 1937. A few observations on the hairs of the stamens of *Tradescantia*  
193 *virginica*. Protoplasma 27: 190–211.
- 194 2. Roelofsen, P.A. and Houwink, A. L. 1951. Cell wall structure of staminal hairs of  
195 *Tradescantia virginica* and its relation with growth. Protoplasma 40: 1–22.
- 196 3. Roelofsen, P. A., 1958. Cell-wall structure as related to surface growth. Some  
197 supplementary remarks multinet growth. Acta. Bot. Neerl. 7: 77–89.
- 198 4. Ohad I, Danon D (1964) On the dimensions of cellulose microfibrils. J Cell Biol 22: 302-  
199 305
- 200 5. Frey-Wyssling A (1968) The ultrastructure of wood. Wood Sci Technol 2: 73-83

- 201 6. Heyn AN (1969) The elementary fibril and supermolecular structure of cellulose in soft  
202 wood fiber. *J Ultrast Res* 26: 52-68
- 203 7. Somerville, C., Bauer, S., Brininstool, G., Facette, M., Hamann, T., Milne, J., Osborne, E.,  
204 Paredez, A., Persson, S., Raab, T., Vorwerk, S. and Youngs, H. 2004. Toward a systems  
205 approach to understanding plant cell walls. *Science* 306: 2206-2211.
- 206 8. Cosgrove, D. J. 2005. Growth of the plant cell wall. *Nature rev. Molecular cell biology* 6:  
207 850-861.,
- 208 9. Ding, S-Y. and Himmel, M. E. 2006. The maize primary cell wall microfibril: a new model  
209 derived from direct visualization. *J. Agri. Food Chem.* 54: 597-606.;
- 210 10. Ding SY, Liu YS, Zeng Y, Himmel ME, Baker JO, et al. (2012) How does plant cell wall  
211 nanoscale architecture correlate with enzymatic digestibility? *Science* 338: 1055-1060
- 212 11. McCann, M. C. and Roberts, K. 1991. Architecture of the primary cell wall. *Academica*  
213 *Press, London, UK*
- 214 12. Rose, J. K. C. and Bennett, A. B. 1999. Cooperative disassembly of the cellulose xyloglucan  
215 network of plant cell walls: parallels between cell expansion and fruit ripening. *Trends Plant*  
216 *Sci.* 4: 176-183.
- 217 13. Newman, R. H., Hill, S. J. and Harris, P. J. 2013. Wide-angle x-ray scattering and solid state  
218 nuclear magnetic resonance data combined to test models for cellulose microfibrils in mung  
219 bean cell walls. *Plant Phys* 163: 1558-1567
- 220 14. Thomas, L. H., Forsyth, V. T., Sturcová, A., Kennedy, C. J., May RP, Altaner, C. M.,  
221 Apperley, D. C., Wess, T. J. and Jarvis, M. C. 2013. Structure of cellulose microfibrils in  
222 primary cell walls from collenchyma. *Plant Physiol.* 161: 465–476.
- 223 15. Sarkar, P., Bosneaga, E. and Auer, M. 2009. Plant cell walls throughout evolution: towards  
224 a molecular understanding of their design principles. *Journal of Experimental Botany* 60:  
225 3615-3635.
- 226 16. Banasiak, A. 2014 Evolution of the cell wall components during terrestrialization *Acta Soc*  
227 *Bot Pol* 83(4):349–362
- 228 17. Llyod C. 2011. Dynamic microtubules and the texture of plant cell walls. *Int. Rev. Cell Mol.*  
229 *Biol.* 287: 287-329.
- 230 18. Sarkar, P. and Auer, M. (2016) Organization of the plant cell wall, In: *Molecular cell*

- 231 biology of the growth and differentiation of plant cells, Rose, R. J [Ed.]: 101-119
- 232 19. Park, Y. B. and Cosgrove, D. J. 2012. A revised architecture of primary cell walls based on  
233 biomechanical changes induced by substrate-specific endoglucanases. *Plant Physiol.* 158:  
234 1933-1943
- 235 20. Zienkiewicz, Olgierd Cecil, et al. The finite element method. Vol. 3. London: McGraw-hill,  
236 1977.
- 237 21. Kha H, Tuble SC, Kalyanasundaram S, Williamson RE (2010) WallGen, software to  
238 construct layered cellulose-hemicellulose networks and predict their small deformation  
239 mechanics. *Plant Physiol* 152: 774–786
- 240 22. Yi, H., & Puri, V. M. (2012). Architecture-based multiscale computational modeling of  
241 plant cell wall mechanics to examine the hydrogen-bonding hypothesis of the cell wall  
242 network structure model. *Plant physiology*, 160(3), 1281-1292.
- 243 23. Nili, A., Yi, H., Crespi, V. H., & Puri, V. M. (2015). Examination of biological hotspot  
244 hypothesis of primary cell wall using a computational cell wall network  
245 model. *Cellulose*, 22(2), 1027-1038.
- 246 24. Sarkar, P., Bosneaga, E., Yap, E. G. Jr., Das, J., Tsai, W-T., Cabal, A., Neuhaus, E., Maji,  
247 D., Kumar, S., Joo, M., Yakovlev, S., Csencsits, R., Yu, Z., Bajaj, C., Downing, K. H. and  
248 Auer, M. 2014. Electron Tomography of Cryo-Immobilized Plant Tissue: a novel approach  
249 to studying 3d macromolecular architecture of mature plant cell walls in situ. *PLoS ONE*, 9:  
250 e106928.
- 251 25. The ultrastructural demonstration o/ compounds containing 1,2-glycol groups in plant cell  
252 walls G. G. JEWELL and c . A. SAXTON *Histochemical Journal*, 2 (1970), 17-27
- 253 26. Zablackis E, Jing H, Muller B, Darvill AG, Albersheim P: Characterization of the cell-wall  
254 polysaccharides of *Arabidopsis thaliana* leaves. *Plant Physiol* 1995, 107:1129-1138.
- 255 27. Busse-Wicher M, Gomes TC, Tryfona T, Nikolovski N, Stott K, Grantham NJ, Bolam DN,  
256 Skaf MS, Dupree P. The pattern of xylan acetylation suggests xylan may interact with  
257 cellulose microfibrils as a twofold helical screw in the secondary plant cell wall of  
258 *Arabidopsis thaliana*. *Plant J.* 2014; 79:492–506
- 259 28. Simmons TJ, Mortimer JC, Bernadinelli OD, Poepler AC, Brown SP, deAzevedo ER,  
260 Dupree R, Dupree P. Folding of xylan onto cellulose fibrils in plant cell walls revealed by  
261 solid-state NMR. *Nature Communications* 2016; 13902

- 262 29. Bailie, J. A., Ley, R. P., & Pasricha, A. (1997). A summary and review of composite  
263 laminate design guidelines, Northrop Grumman Report under NASA Contract NAS1-  
264 19347.
- 265 30. Park, Robert, and Thomas Paulay. Reinforced concrete structures. John Wiley & Sons,  
266 1975.
- 267 31. Yan, Libo, and Nawawi Chouw. "Crashworthiness characteristics of flax fibre reinforced  
268 epoxy tubes for energy absorption application." *Materials & Design*51 (2013): 629-640.

269

270

271 **Acknowledgement:**

272 We thank Drs. Carragher, Potter, Quispe, Jacovetty, Cheng from National Resource for  
273 Automated Molecular Microscopy (NRAMM), Csencsits, Bosneaga, Downing (LBNL),  
274 McDonald, Zalpuri (UC Berkeley). We acknowledge support by Energy Biosciences Institute  
275 (grant 007G18). Work was continued at Joint BioEnergy Institute, supported by the U.S.  
276 Department of Energy, Office of Science, Office of Biological and Environmental Research,  
277 through contract DE-AC02-05CH11231 between Lawrence Berkeley National Laboratory and the  
278 U.S. Department of Energy. The United States Government retains and the publisher, by  
279 accepting the article for publication, acknowledges that the United States Government retains a  
280 non-exclusive, paid-up, irrevocable, worldwide license to publish or reproduce the published  
281 form of this manuscript, or allow others to do so, for United States Government purposes. MA  
282 acknowledges support of the cryo-electron microscopy at LBNL by the NIH/GMS grant  
283 P01GM051487.

284

285 The authors declare no financial and non-financial competing interests.

286 **FIGURE LEGEND:**

287 **Fig 1.** Cryo-electron tomography of thick xylem tracheary elements cell walls and thin xylem  
288 parenchyma. A) 1 month-old *Arabidopsis thaliana* inflorescence stem tissue. The white box  
289 marks a stem segment that was taken for cryo-electron tomography. B) Cross-section through  
290 the stem showing the different tissue and cell types in the stem. The black box marks a tissue  
291 region similar to the one used for cryo-EM imaging. Note that the section displayed is a Toluene  
292 Blue-stained semithin section cut from a high-pressure frozen, freeze-substituted and resin-  
293 embedded samples imaged by optical light microscopy in order to provide an overview of the  
294 tissues and cells in the plant stem organ. Scale bar = 50  $\mu\text{m}$ . C) Electron micrograph of a  $\sim 25 \mu\text{m}$   
295 by  $\sim 25 \mu\text{m}$  tissue region of interest showing both a thick xylem tracheary elements cell wall (left  
296 box) and a thin xylem parenchyma cell wall (right box). Scale bar = 5  $\mu\text{m}$ . D) Zero degree  
297 projection view cryo-electron microscopy of thick xylem tracheary elements cell wall, containing  
298 primary and secondary cell wall. E) Zero-degree projection view cryo-electron microscopy of  
299 thin xylem parenchyma cell wall, containing only primary cell wall. F) 3D rendering of a  $\sim 50 \text{ nm}$   
300 thin slab of a cryo-tomogram of xylem tracheary elements cell wall. G) 3D rendering of a  $\sim 50$   
301 nm thin slab of a cryo-tomogram of xylem parenchyma cell wall. Scale bars = 100 nm.

302

303 **Fig 2.** Statistical analysis based 3D modeling of microfibrils and cross-links A) 3D rendering of  
304 two neighboring microfibrils in the cryo-tomogram. Scale bar = 5 nm. B) Plot of the statistical  
305 analysis of the frequency of microfibril diameter reveals a peak at 3.5 nm and 5-5.5 nm, and a  
306 small shoulder to dimensions up to 9 nm. C) Gallery of 3 different microfibrils cross-sections  
307 illustrating the numbers obtained in Fig 4B) with microfibrils being round at  $\sim 3.5 \text{ nm}$  (middle  
308 panel), oval shaped with a diameter of  $\sim 3.5 \text{ nm}$  by  $\sim 5-5.5 \text{ nm}$  (left panel), reaching up to 9-10

309 nm (right panel). Scale bars = 2 nm. D) Hypothetical 3D-CAD model with all of cellulose  
310 residing in the microfibrils and hemicellulose confined to cross-links only. E) Alternative 3D  
311 model of two adjacent microfibrils (middle) that contain a cellulose core (left), surrounded by a  
312 hemicellulose sheath as well as a cross-connection between adjacent microfibrils (right). F)  
313 Occurrence of cross-links in PCW (left), SCW (middle) and chemically extracted PCW (right).  
314 Scale bars = 5 nm.

315

316 **Fig 3.** Supramolecular 3D organization of microfibrils in xylem tracheary elements and xylem  
317 parenchyma cell walls. A) Zero-degree projection image of xylem tracheary elements cell wall,  
318 showing two adjacent cells with both secondary and primary cell walls. Note that one of the two  
319 adjacent cells has several secondary cell wall subregions, called S1, S2 and S3 and transition  
320 zones (T). On the other side of the middle lamella (M) is the primary cell wall P, a transition  
321 zone T as well as one secondary cell wall region. Scale bar = 100 nm. B) Idealized model of a  
322 xylem tracheary elements cell wall at side view (top), slanted 45° view (middle) and an en-face  
323 view of microfibrils (bottom). Note that microfibril orientation differs in S1, S2 and S3, with 15  
324 layers of microfibril featuring an average angle of minus ~27°, plus ~27° and minus ~27° off the  
325 longitudinal axis (plant elongation direction). S3, S2, S1 and the Primary Cell Wall (PCW)  
326 regions are separated by a three layer-transition zone with axial microfibril orientation. The  
327 pectin-rich middle lamella is depicted in the idealized model as a single plane separating the cell  
328 walls of two adjacent cells. C) Zero-degree projection image of xylem parenchyma cell walls,  
329 showing two adjacent cells with only primary cell walls. Scale bar = 100 nm. D) Idealized  
330 model of a xylem parenchyma cell wall at side view (top), D2) slanted 45° view (middle) and an  
331 en-face view (bottom). Note that in PCW microfibril orientation is mostly axial.

332

333 **Fig 4.** Computational analysis of cell wall mechanical properties. (A, B) Supramolecular  
334 structure segmented from the tomographic reconstruction (A) and a geometrically idealized cell  
335 wall model (B) both including only the S1-T-S2-T-S3 portions of the idealized model. (C, D)  
336 Deformation of the cell wall under radial pressure, for both the segmented volume (C) as well as  
337 an idealized model (D), revealing a linear distribution of force throughout the secondary cell  
338 wall. (E) Graphic depiction of the Young elastic moduli (radial, longitudinal and tangential) for  
339 primary cell walls, secondary cell wall regions segmented from the tomographic 3D data as well  
340 as idealized models of the secondary cell walls, before and after introduction of tortuosity. (F, G,  
341 H) Load bearing behavior of microfibrils under buckling due to axial stress, revealing significant  
342 decrease of failure load but very high increase of ductility (F), when moving from an idealized  
343 straight microfibril (G) to a tortuous fiber (H).

---

344

345

346 **Supplementary Materials:**

347 **Fig S1.** Choice of Modeling Approach. We considered four idealized modeling approaches: (A)

348 NET is a network model that fully accounts for the 3D volume of both microfibrils and cross-

349 links B) BEAM is a simplified approach based on Timoshenko beam mechanical theory (C)

350 NETMAT is similar to NET, with an added a matrix in between the fibers and (D) MAT, which

351 is similar to NETMAT but does not contain inter-microfibrillar cross-connectors.

352 **Fig S2.** Modeling of lignin distribution in secondary cell wall (A, D) Secondary cell wall with an

353 assumed 0% lignin. 20% of the total volume available is occupied by the cellulose/hemicellulose

354 network. (A) overview (D) close-up detail. (B, E) 5% total volume of lignin (equivalent to a 15-

355 20% dry weight) is added to the segmented map displayed in A. (B) overview and (E) close-up

356 detail reveal vast amount of space remains unoccupied, inconsistent with a dense matrix in which

357 microfibrils are embedded and thus mechanically connected. Increasing the lignin to 10% of total

358 volume (resulting in a ~30-35% dry weight) leads to much more densely connected network,

359 which is consistent with a matrix at these much higher lignin content. (C) overview (F) close-up

360 detail. Note that the corresponding dry-weight is an estimate making assumptions on similarity in

361 density of lignin and cellulose/hemicellulose matrix. (G) Comparison of elastic moduli for radial

362 (Er), tangential (Et) and longitudinal (EL) force loading.

363 **Fig S3.** Hypothetical XTE cell wall models with varying supramolecular organization. A) Cell

364 wall model with 15 microfibril layers each in the S1, S2 and S3 SCW that were inclined minus

365 27°, plus 27° and minus 27°, respectively, and that were separated from each other by a 3

366 microfibril layer transition zone with axial microfibril orientation. B) Cell wall model without



367 transition zones, and 18 layers of microfibrils that are minus/plus/minus 27° inclined. C) All

368 microfibrils (54 layers) are all inclined by 27°.

369

370 **Table S1.** Differences on the calculated properties calculated by homogenization method on  
371 differently sized density map fragments.

372

| Size of the Density Map Fragment Used on the Calculation ([nm <sup>3</sup> ]) |              | Absolute Difference Between RVE A and RVE B on the Calculated Mechanical Properties (%) |
|-------------------------------------------------------------------------------|--------------|-----------------------------------------------------------------------------------------|
| RVE A                                                                         | RVE B        |                                                                                         |
| 200x200x50                                                                    | 300x100x50   | 40                                                                                      |
| 300x100x50                                                                    | 400x350x50   | 15                                                                                      |
| 300x100x50                                                                    | 300x300x100* | 13                                                                                      |
| 300x100x50                                                                    | 300x300x200* | 12                                                                                      |

373

374

375

376 **Table S2.** Average strain equivalence errors of the different elastic laws used in homogenization.

377

| Elastic Constitutive Law Used in Homogenization | Average Strain Equivalence Error |
|-------------------------------------------------|----------------------------------|
| Isotropy                                        | 67%                              |
| Transverse isotropy                             | 20%                              |
| Orthotropy                                      | 6%                               |

378

379

380 **SUPPLEMENTAL MATERIAL**

381

382 **Materials and Methods:**

383 **Plant Material:** Wild type *Arabidopsis thaliana* (*Arabidopsis*) seeds from the Colombia ecotype  
384 (Col 0) were sterilized in 30% bleach, 0.02% Triton and vernalized at 4 °C in water for 48 hours.  
385 They were germinated on 0.7% agar plates containing 0.5x Murashige and Skoog medium for 10  
386 d at 21 °C under continuous light in a growth chamber. The seedlings were then transferred to  
387 pots containing soil mixture and placed in a growth chamber programmed for a 16 h light/8 h  
388 dark cycle at 21 °C. Stem tissue from ~1 month old plants that had newly growing inflorescence  
389 stems (2-3 cm long) were used for electron tomography. Stem segments from freshly collected  
390 samples were used for electron tomography.

391

392 **Cryo-electron tomography of *Arabidopsis thaliana*:** ~2 mm long stem segments of *Arabidopsis*  
393 *thaliana* (Col 0) were frozen in sealed copper capillary tubes in 20% dextrane by self-pressurized  
394 rapid freezing method (32) and sectioned at -160°C using a Leica EMUC7 ultramicrotome with a  
395 Leica EM FC7 cryo chamber attachment (Leica Microsystems Inc.). Ribbons of nominal ~90 nm  
396 ultrathin cryo-sections were manipulated by hand with an eye lash and placed onto carbon-coated  
397 lacey formvar grids and attached to the grids using a Leica EM CRION ionizer. Single-axis cryo  
398 tilt series were collected from -60° to +60° with 2° increments under low dose conditions on two  
399 different set-up. Some datasets were collected on a Tecnai F20 TEM (Thermofisher, Inc,  
400 Hillsboro, OR, USA) with a 4K x 4K Gatan Ultrscan 4000 CCD camera (Gatan Inc., Pleasanton,  
401 CA, USA) and Legimon (33) at 120 kV and a voxel size of 0.44 nm. Other datasets were collected

402 on a JEOL JEM-3100FFC TEM (JEOL Ltd, Akishima, Tokyo, Japan) equipped with a field  
403 emission gun electron source operating at 300kV, an in-column Omega energy filter (JEOL), a  
404 cryo- transfer stage and a Gatan 795 2Kx2K CCD camera and SerialEM (34) and a voxel size of  
405 1.1 nm voxel size. Images were aligned by patch-tracking method in IMOD. Reconstruction of all  
406 tomograms was done with IMOD (The Boulder Laboratory for 3D Electron Microscopy of Cells,  
407 University of Colorado Boulder, CO) using the back-projection method (35-37) Cryo-tomograms  
408 collected on a 4K x 4K camera were binned by 2 to obtain a voxel size of 0.867 nm, to be  
409 comparable with the other tomograms. All tomograms were subjected to image filtering  
410 (nonlinear anisotropic diffusion filter) to improve contrast.

411

412 **Pectin and hemicellulose removal from *Arabidopsis thaliana*:** ~2 mm long stem segments were  
413 fixed in 4% paraformaldehyde, 2% glutaraldehyde in 0.03 M phosphate buffer (pH 7.4)  
414 containing 0.5mg/ml ruthenium red overnight at 4 °C. Samples were then rinsed in the same  
415 buffer and consecutive stem segments from the same plants were treated in parallel with three  
416 different treatments: (1) Control - no chemical treatment; (2) 0.5 % ammonium oxalate at 60° C  
417 for 48 hours for pectin removal; and (3) pectin removal as (2) followed by 4 % NaOH at RT for  
418 96 h to remove the majority of hemicelluloses and any non-cellulosic polysaccharides. All  
419 samples were rinsed in distilled water and then fixed in 0.1% osmium tetroxide with 0.5mg/ml  
420 ruthenium red for 1 h at RT. The samples were then dehydrated in acetone series and infiltrated in  
421 Epon-Araldite resin-acetone series using Leica EM AMW automatic microwave tissue processor.  
422 Samples were incubated overnight in 100% resin and then polymerized at 60°C for 2-3 days.

423

424 **Ultrathin sectioning and electron tomography of resin embedded samples:** 150 nm thick  
425 sections were cut from resin embedded samples using Leica UC6 ultramicrotome (Leica  
426 Microsystems Inc.). All sections were labeled with 5 nm gold fiducials for 4 mins each on both  
427 sides followed by several washes in distilled water. The sections were then post stained with 2%  
428 uranyl acetate in methanol for 5 mins, followed by Reynold's lead citrate solution for 2 mins.  
429 After locating areas of interest, dual axis tilt series were collected from +65° to -65° with 1°  
430 increments on a Philips Tecnai F12 TEM (FEI) with 2K x 2K Gatan Ultrascan 1000 CCD camera  
431 and SerialEM software (36, 37), at 120 kV accelerating voltage and a voxel size of ~0.8 nm.  
432 Images were aligned by tracking the fiducial markers in IMOD. Reconstructions of tomograms  
433 were done using the weighted back-projection method in IMOD.

434

435 **Segmentation and image analysis:** Segmentation of all tomograms was done by the 'threshold  
436 segmentation' method in Amira (Thermofisher Inc, Hillsboro, OR, USA). A triangular mesh  
437 surface was generated in Amira with the 'unconstrained smoothing' option, for visualization and  
438 quantitative geometric analysis of the cell wall components. Dimensions of long filamentous  
439 structures, the distance (center-to-center) and the shortest gap between the filaments, angle of  
440 microfibrils, and the dimensions of short bridge-like cross-links joining the long filaments were  
441 measured for each tomogram volume in Amira.

442

443 **Simulation:** Geometry of the ideal models was mostly generated with Matlab (MathWorks, Inc,  
444 Natick, MA, USA), mechanical analysis of the numerical models was mainly performed with  
445 COMSOL (COMSOL AB, Stockholm, Sweden) and most postprocessing was set up with Python  
446 scripts in Paraview (Sandia National Laboratory and Kitware Inc, Los Alamos National

447 Laboratory, Los Alamos, NM, USA). Some exceptions were the nonlinear buckling analysis  
448 which was performed in ANSYS (Swanson Analysis Systems Inc., Canonsburg, PA, USA), the  
449 homogenization of the cell wall and the effect of lignification which was carried out with the  
450 Software Geodict (Math2Market GmbH, Kaiserslautern, Germany) as well as the masking of the  
451 wall to differentiate hemicellulose out of cellulose, which was conducted with VOXELCON  
452 (Quint Corporation, Tokyo, Japan).

453

#### 454 *Mechanical properties of experimental cell wall density maps*

455 We applied homogenization, based on the strain equivalence principle, at different  
456 fractions of the measured cell wall, with representative volume elements (RVE) being loaded in  
457 different directions (radial, axial, shear forces). Assuming a homogeneous material this test  
458 results in predictions of the mechanical properties of entire cell walls. We used a 300x100x50  
459 nm RVE, as larger RVEs gave very similar results, whereas smaller RVEs gave substantially  
460 different results (Table S1). The suitability of distinct elastic constitutive laws used in the  
461 homogenization calculations showed that that average strain equivalence error is low (6%) only  
462 in orthotropy, and hence is ideal for modeling the cell walls (Table S2).

463

#### 464 *Ideal models and comparison with the experimental density maps*

465 For our simulations we considered four idealized modeling approaches (Fig. S1): 1) a  
466 network model that fully accounts for the 3D volume of both microfibrils and cross-links (NET);  
467 2) a simplified version of NET (BEAM), using Timoshenko beam mechanical theory (38-39); 3)  
468 a model, with an added a matrix in between the fibers, we call NETMAT; and 4) a model similar

469 to NETMAT but without intermicrofibril cross-links, we call MAT. We assumed the same inputs  
470 for all four models, and varied the elastic moduli of the interfibrillar matrix from 0.1 to 10 GPa.  
471 We calculated the elastic (Young) moduli (radial, longitudinal, tangential and shear), which  
472 provides an estimate of the stiffness of the cell wall, as well as the elastic strain energy density  
473 stored in the cellulose/hemicellulose and matrix, and compared with the results from the  
474 experimental map. Despite having been used frequently in previous computational simulations  
475 we found that BEAM vastly underestimates the stiffness mostly because cross-links lengths in  
476 this model are highly exaggerated and torsion is not accurately modelled. For NETMAT and  
477 MAT, the stiffness increases by up to two orders of magnitude in the transverse direction, with  
478 most of the elastic energy being stored in the matrix rather than the fibers, rendering the 3D  
479 organization of microfibrils and cross-links nearly meaningless. We chose the NET model for  
480 our idealized model simulations. The calculated stiffness in NET ( $E_R=4\text{MPa}$ ,  $E_T=9\text{ MPa}$ ,  
481  $E_L=1520\text{ MPa}$ ) were in good agreement with the homogenized tomography model results, except  
482 that the stiffness in the longitudinal (axial) direction was  $\sim 25$  fold higher (Fig. 4E). However, if  
483 tortuosity is considered in the NET model (see below), it has a very limited influence in the  
484 radial and transverse directions, but the stiffness drops drastically in the axial direction ( $E_R=4.5$   
485  $\text{MPa}$ ,  $E_T=9.2\text{ MPa}$ ,  $E_L=63\text{ MPa}$ ) bringing it closer to results of SCW-T in all directions. This  
486 reinforces the geometrical pattern idealization and the NET approach as a suitable method to  
487 model the SCW.

#### 488 *Introduction of tortuosity into the NET model*

489 The  $\sim 25$ -fold discrepancy in the longitudinal/axial moduli between NET and MAP led us  
490 to study the experimental map in more detail. We realized that microfibrils had a somewhat  
491 irregular, wavy appearance, with an uneven distribution of hemicellulose along the cellulose

492 core, which results in a weakening of the microfibril in the axial direction. We modelled such  
493 imperfections by introducing a tortuosity (twist) in our idealized microfibril model. Introduction  
494 of tortuosity has a very limited influence in the transverse direction, but results in stiffness drop  
495 in the axial direction, which brings  $E_L$  in close agreement with the MAP model. We analyzed the  
496 implications of tortuosity by performing nonlinear buckling and viscoelastic analyses (Fig. 4H,  
497 I). While the buckling load is reduced ~50-fold, tortuous fibers are much more ductile as they  
498 can undergo ~9-times larger deformations before collapse in comparison to straight idealized  
499 fibers, storing up to 43% more elastic energy than straight fibers as they deform. We conclude  
500 that while tortuosity significantly reduces the stiffness of the cell wall, it also increases its  
501 ductility as well as the dissipation of elastic and viscoelastic energies, which could be crucial for  
502 plants to prevent breakage against extreme loading (such as in high winds).

### 503 *Mechanical Analysis of NET model*

504 We tested several geometrical features of the NET model, including network size, cross-  
505 link arrangement, number of cross-links with the same volume of hemicellulose, the inclination  
506 of the cross links as well the orientation of the microfibrils, and found that neither an increase of  
507 the height, nor length, nor thickness of the overall network significantly altered the stiffness or  
508 the relative elastic energy storage, if the ratio of cross links per length is kept constant,  
509 reinforcing the notion that mechanical analysis of relatively small cell wall portions is still  
510 relevant for entire cells. Fewer but thicker cross-links promote better load transfer to  
511 microfibrils, leading to more evenly distributed strain energy. The inclination of the  
512 hemicellulose cross-links had little effect on the overall stiffness.

513

514 Supplemental Material References:



- 515 32. Yakovlev S, Downing KH (2011) Freezing in sealed capillaries for preparation of frozen  
516 hydrated sections. *J Microscopy* 244: 235-247
- 517 33. Suloway C, Pulokas J, Fellmann D, Cheng A, Guerra F, et al. (2005) Automated molecular  
518 microscopy: the new Legion system. *J Struct Biol* 151: 41-60
- 519 34. Mastronarde DN (2005) Automated electron microscope tomography using robust  
520 prediction of specimen movements. *J Struct Biol* 152: 36-51
- 521 35. Kremer JR, Mastronarde DN, McIntosh JR (1996) Computer visualization of three-  
522 dimensional image data using IMOD. *J Struct Biol* 116: 71-76
- 523 36. Mastronarde DN (1997) Dual-axis tomography: an approach with alignment methods that  
524 preserve resolution. *J Struct Biol* 120: 343-352
- 525 37. Timoshenko, S. P., 1921, *On the correction factor for shear of the differential equation for*  
526 *transverse vibrations of bars of uniform cross-section*, *Philosophical Magazine*, p. 744.
- 527 38. Timoshenko, S. P., 1922, *On the transverse vibrations of bars of uniform cross-section*,  
528 *Philosophical Magazine*, p. 125.

529

530

531

532 Figure 1

533

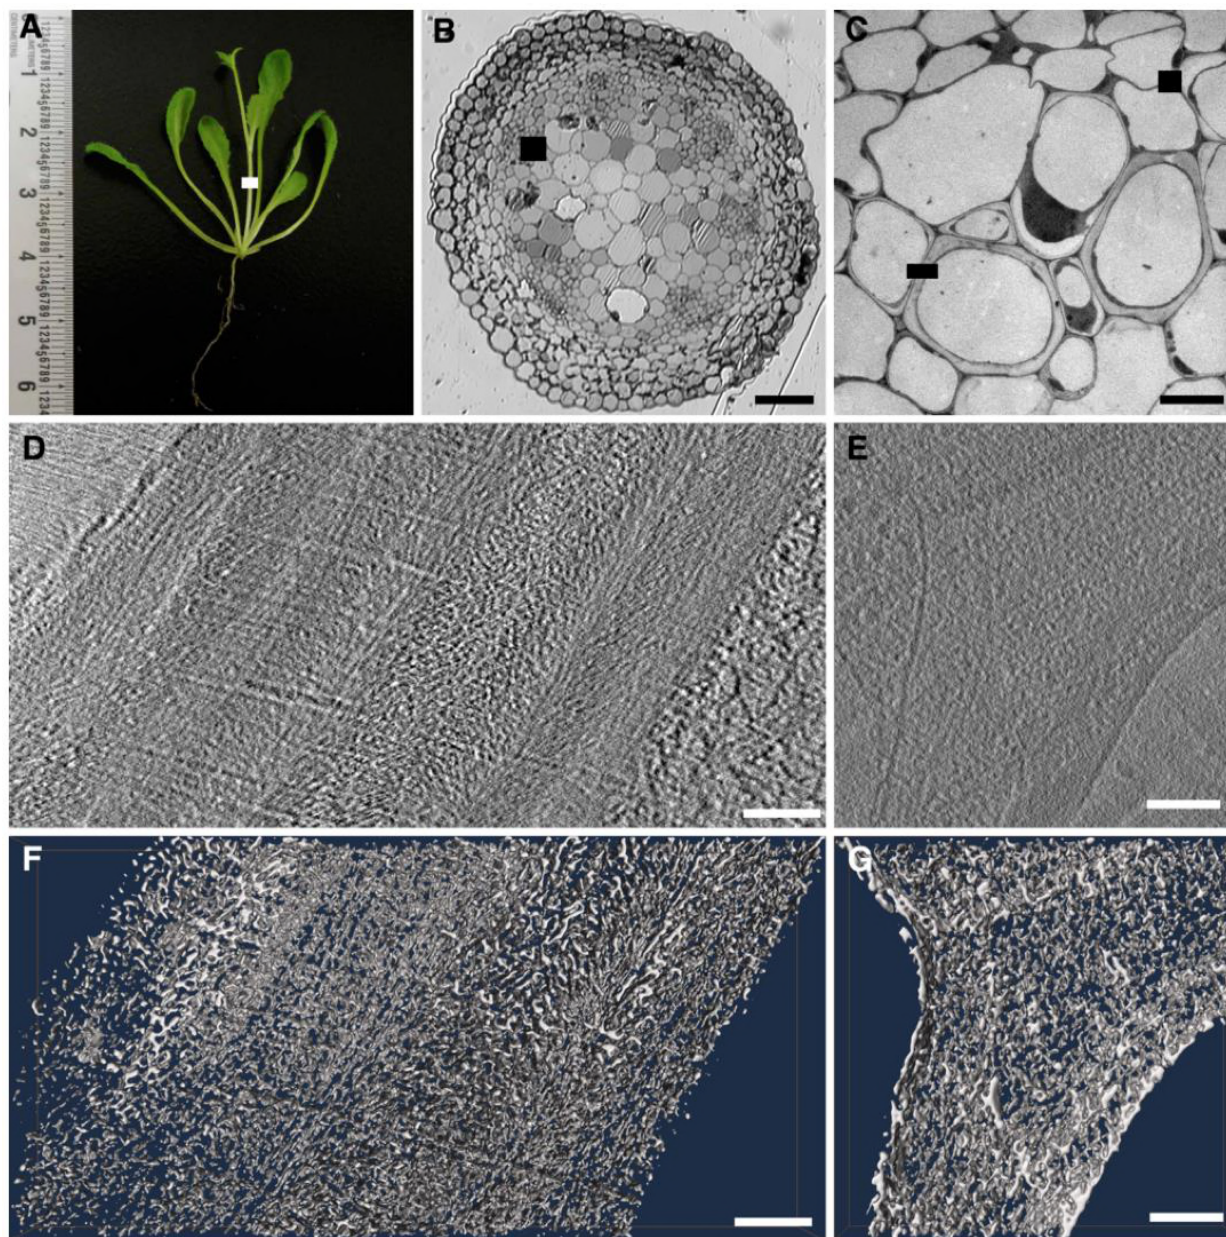

534

535

536 **Fig 1.** Cryo-electron tomography of thick xylem tracheary elements cell walls and thin xylem

537 parenchyma. A) 1 month-old *Arabidopsis thaliana* inflorescence stem tissue. The white box

538 marks a stem segment that was taken for cryo-electron tomography. B) Cross-section through  
539 the stem showing the different tissue and cell types in the stem. The black box marks a tissue  
540 region similar to the one used for cryo-EM imaging. Note that the section displayed is a Toluene  
541 Blue-stained semithin section cut from a high-pressure frozen, freeze-substituted and resin-  
542 embedded samples imaged by optical light microscopy in order to provide an overview of the  
543 tissues and cells in the plant stem organ. Scale bar = 50  $\mu\text{m}$ . C) Electron micrograph of a  $\sim 25 \mu\text{m}$   
544 by  $\sim 25 \mu\text{m}$  tissue region of interest showing both a thick xylem tracheary elements cell wall (left  
545 box) and a thin xylem parenchyma cell wall (right box). Scale bar = 5  $\mu\text{m}$ . D) Zero degree  
546 projection view cryo-electron microscopy of thick xylem tracheary elements cell wall, containing  
547 primary and secondary cell wall. E) Zero degree projection view cryo-electron microscopy of  
548 thin xylem parenchyma cell wall, containing only primary cell wall. F) 3D rendering of a  $\sim 50 \text{ nm}$   
549 thin slab of a cryo-tomogram of xylem tracheary elements cell wall. G) 3D rendering of a  $\sim 50$   
550 nm thin slab of a cryo-tomogram of xylem parenchyma cell wall. Scale bars = 100 nm.  
551

552

553 Figure 2

554

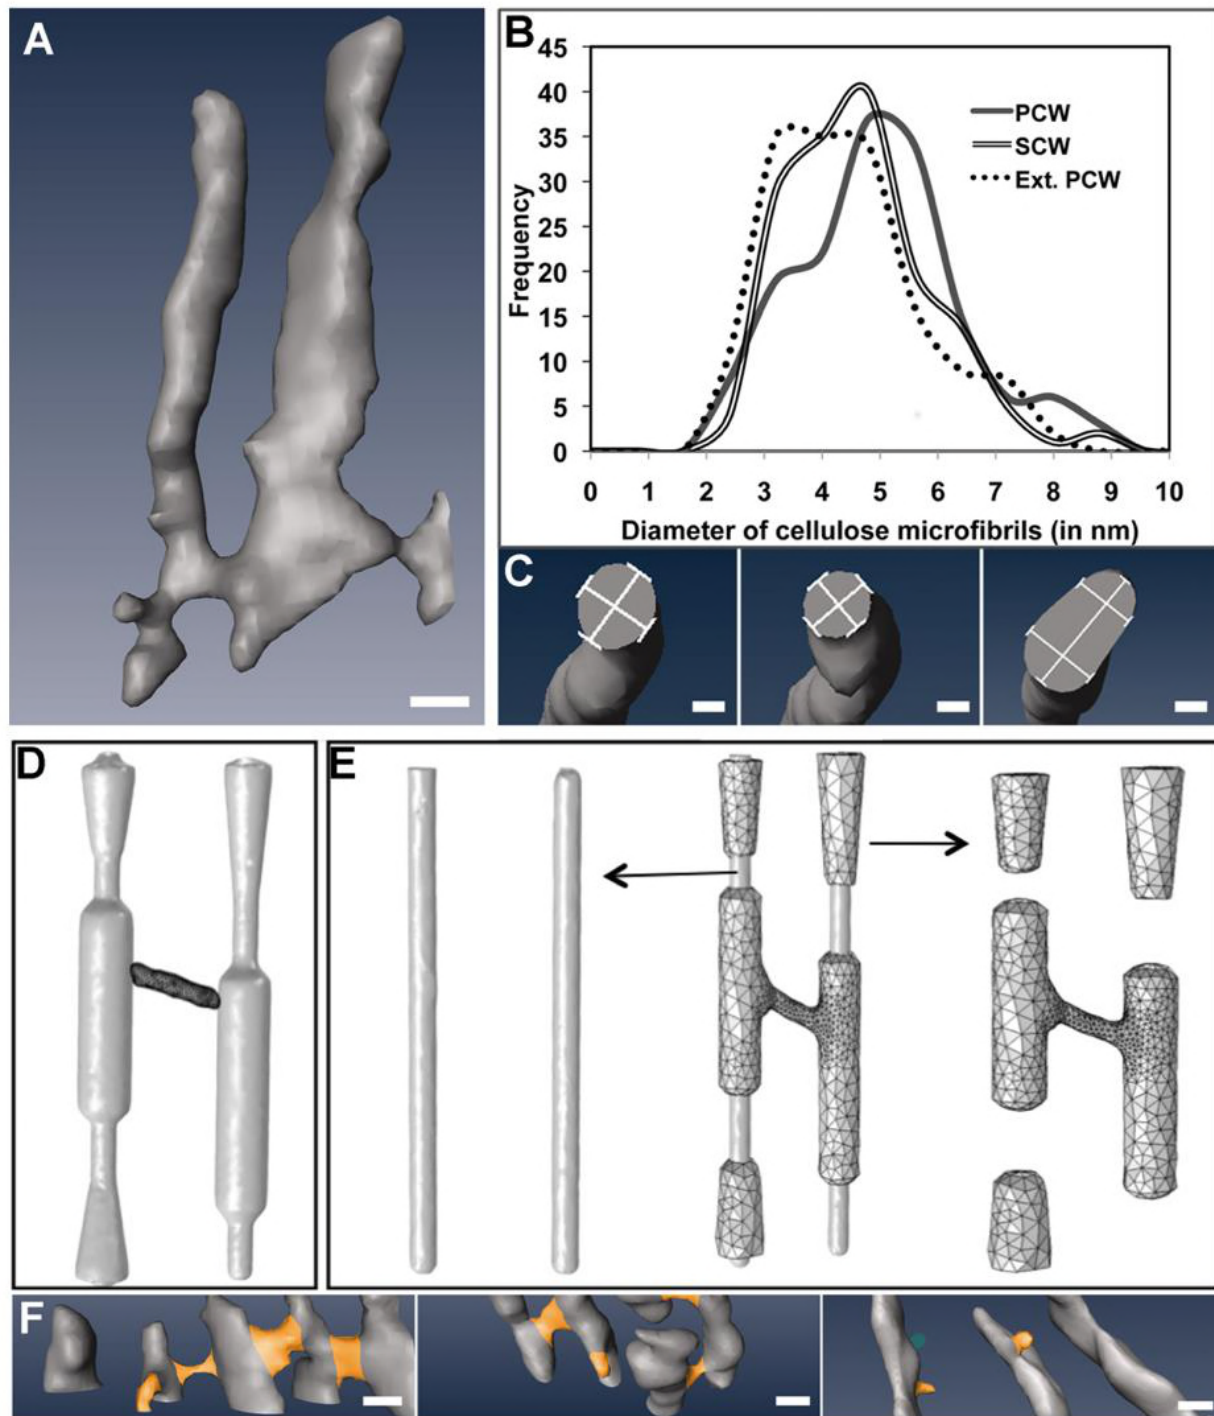

555

556 **Fig 2.** Statistical analysis based 3D modeling of microfibrils and cross-links A) 3D rendering of  
557 two neighboring microfibrils in the cryo-tomogram. Scale bar = 5 nm. B) Plot of the statistical  
558 analysis of the frequency of microfibril diameter reveals a peak at 3.5 nm and 5-5.5 nm, and a  
559 small shoulder to dimensions up to 9 nm. C) Gallery of 3 different microfibrils cross-sections  
560 illustrating the numbers obtained in Fig 4B) with microfibrils being round at ~3.5 nm (middle  
561 panel), oval shaped with a diameter of ~3.5 nm by ~5-5.5 nm (left panel), reaching up to 9-10  
562 nm (right panel). Scale bars = 2 nm. D) Hypothetical 3D-CAD model with all of cellulose  
563 residing in the microfibrils and hemicellulose confined to cross-links only. E) Alternative 3D  
564 model of two adjacent microfibrils (middle) that contain a cellulose core (left), surrounded by a  
565 hemicellulose sheath as well as a cross-connection between adjacent microfibrils (right). F)  
566 Occurrence of cross-links in PCW (left), SCW (middle) and chemically extracted PCW (right).  
567 Scale bars = 5 nm.

568

569

570

571 Figure 3

572

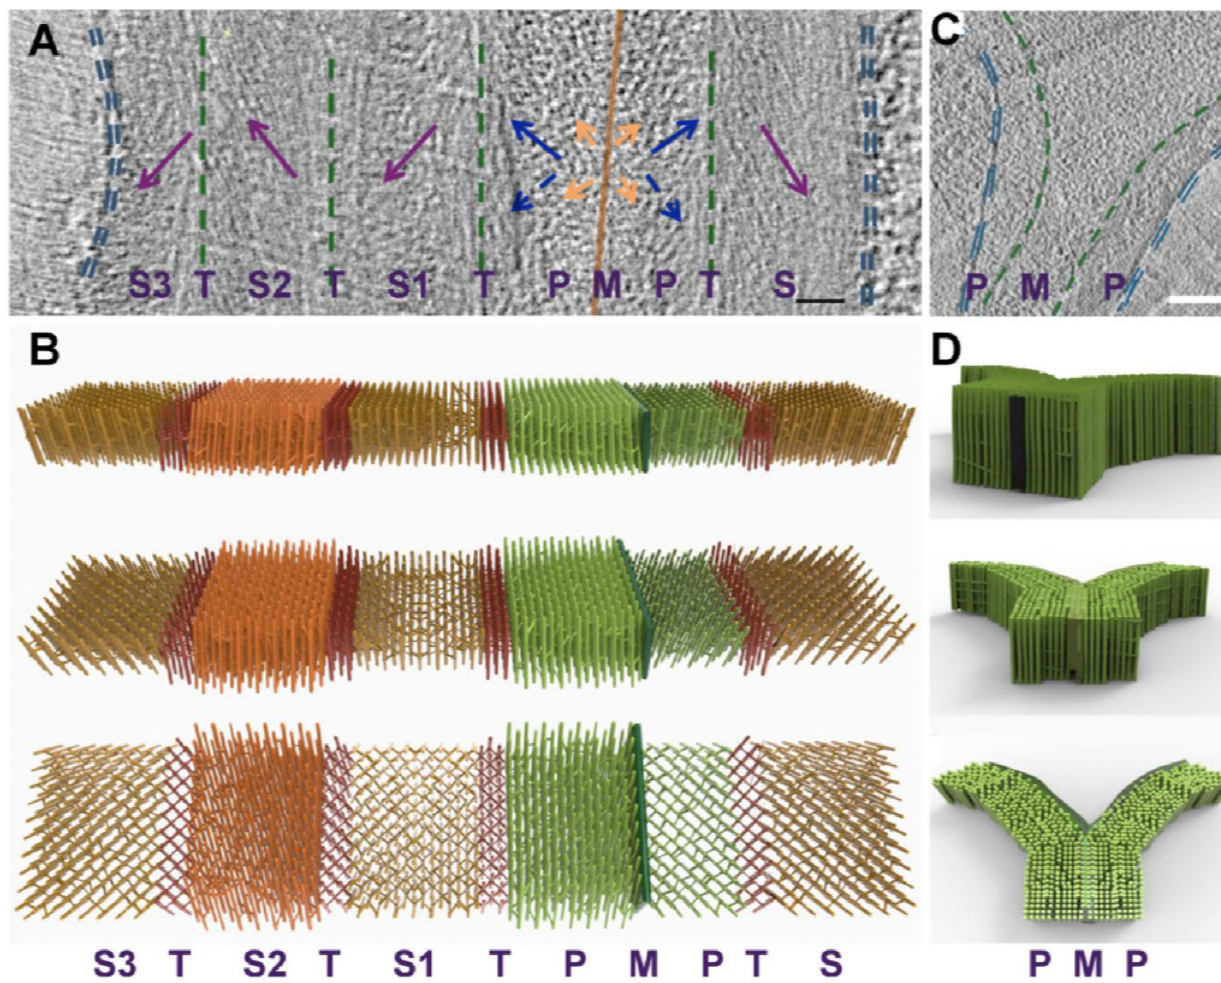

573

574

575 **Fig 3.** Supramolecular 3D organization of microfibrils in xylem tracheary elements and xylem  
576 parenchyma cell walls. A) Zero-degree projection image of xylem tracheary elements cell wall,  
577 showing two adjacent cells with both secondary and primary cell walls. Note that one of the two  
578 adjacent cells has several secondary cell wall subregions, called S1, S2 and S3 and transition  
579 zones (T). On the other side of the middle lamella (M) is the primary cell wall P, a transition  
580 zone T as well as one secondary cell wall region. Scale bar = 100 nm. B) Idealized model of a  
581 xylem tracheary elements cell wall at side view (top), slanted 45° view (middle) and an en-face  
582 view of microfibrils (bottom). Note that microfibril orientation differs in S1, S2 and S3, with 15  
583 layers of microfibril featuring an average angle of minus ~27°, plus ~27° and minus ~27° off the  
584 longitudinal axis (plant elongation direction). S3, S2, S1 and the Primary Cell Wall (PCW)  
585 regions are separated by a three layer-transition zone with axial microfibril orientation. The  
586 pectin-rich middle lamella is depicted in the idealized model as a single plane separating the cell  
587 walls of two adjacent cells. C) Zero-degree projection image of xylem parenchyma cell walls,  
588 showing two adjacent cells with only primary cell walls. Scale bar = 100 nm. D) Idealized  
589 model of a xylem parenchyma cell wall at side view (top), D2) slanted 45° view (middle) and an  
590 en-face view (bottom). Note that in PCW microfibril orientation is mostly axial.  
591

592 Figure 4  
593

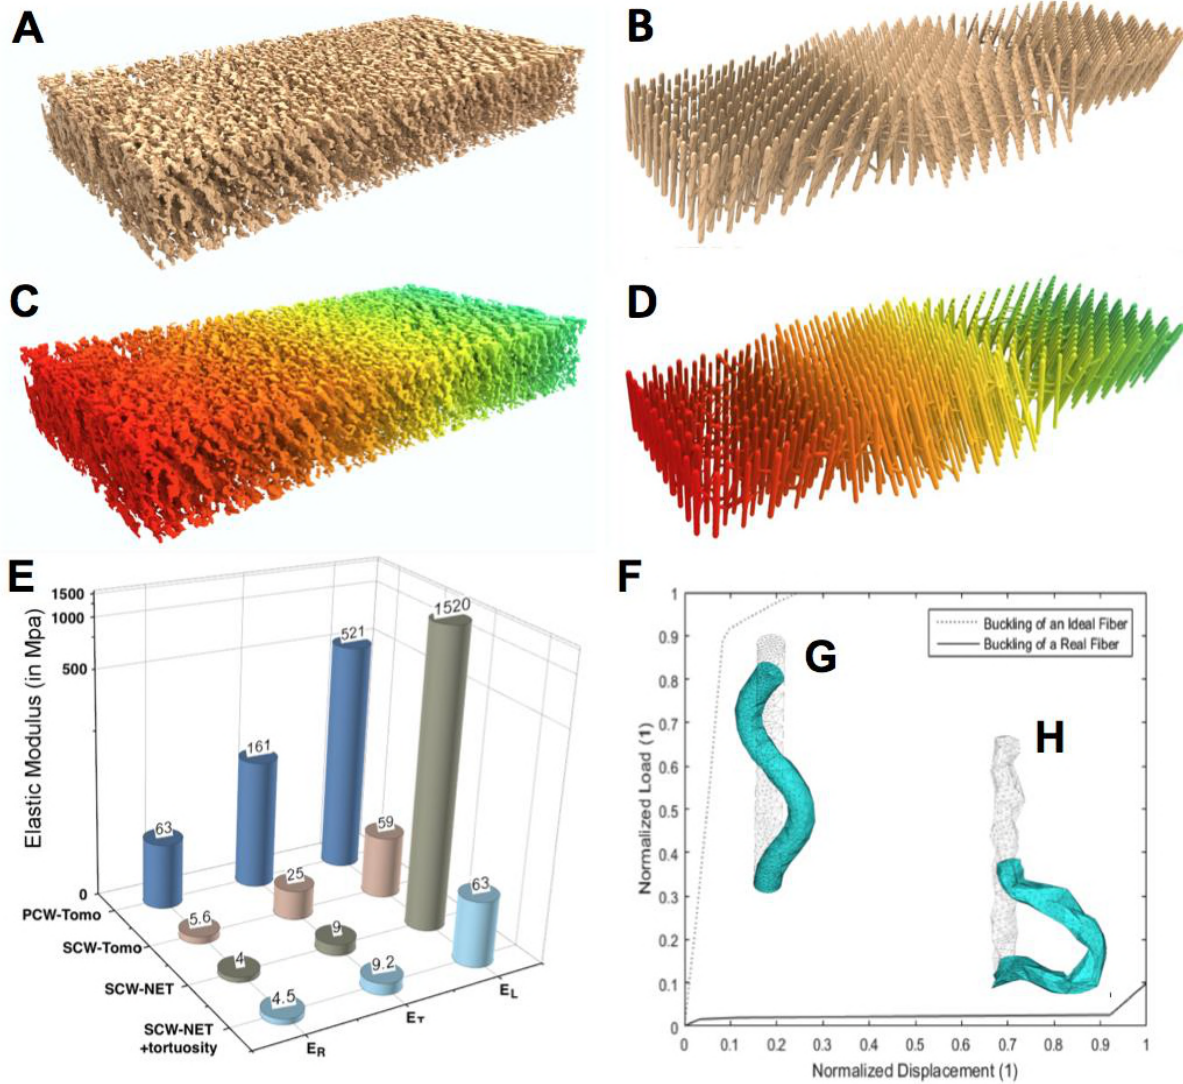

594

595

596

597 **Fig 4.** Computational analysis of cell wall mechanical properties. (A, B) Supramolecular  
598 structure segmented from the tomographic reconstruction (A) and a geometrically idealized cell  
599 wall model (B) both including only the S1-T-S2-T-S3 portions of the idealized model. (C, D)



600 Deformation of the cell wall under radial pressure, for both the segmented volume (C) as well as  
601 an idealized model (D), revealing a linear distribution of force throughout the secondary cell  
602 wall. (E) Graphic depiction of the Young elastic moduli (radial, longitudinal and tangential) for  
603 primary cell walls, secondary cell wall regions segmented from the tomographic 3D data as well  
604 as idealized models of the secondary cell walls, before and after introduction of tortuosity. (F, G,  
605 H) Load bearing behavior of microfibrils under buckling due to axial stress, revealing significant  
606 decrease of failure load but very high increase of ductility (F), when moving from an idealized  
607 straight microfibril (G) to a tortuous fiber (H).

608

---

609

610 Suppl. Figure 1

611

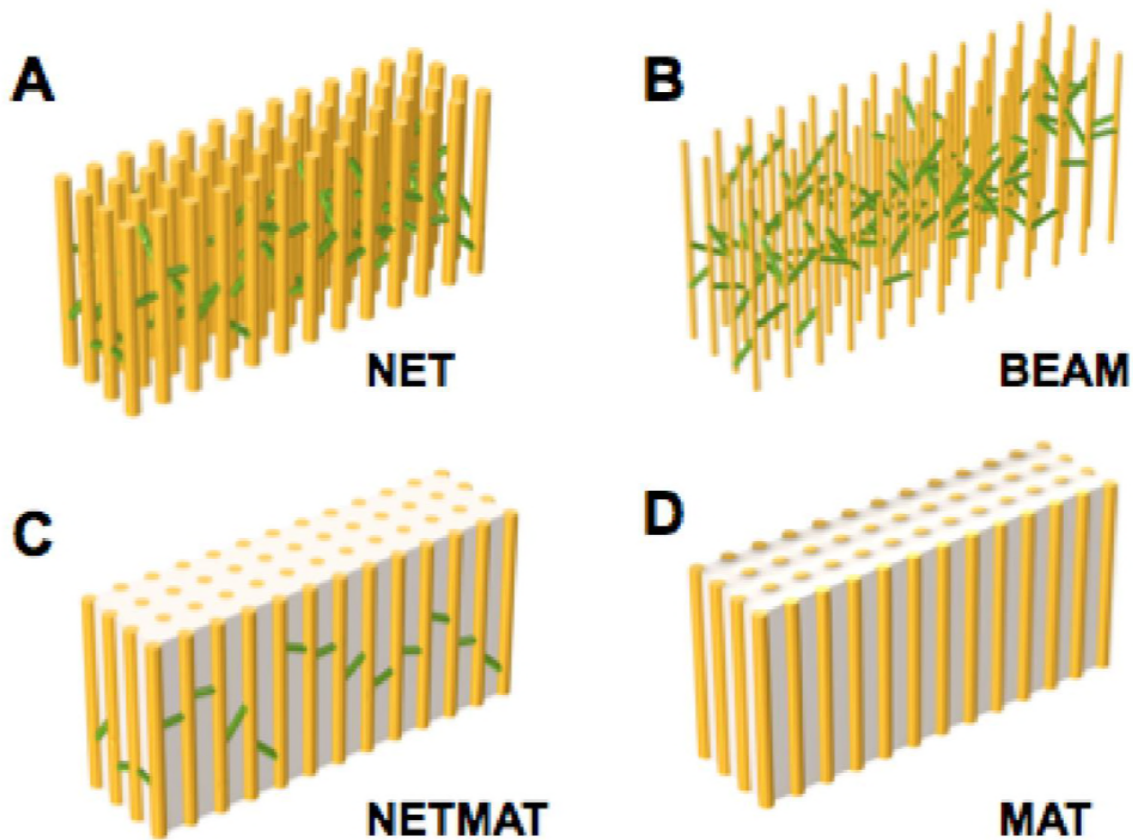

612

613 **Fig S1.** Choice of Modeling Approach. We considered four idealized modeling approaches: (A)

614 NET is a network model that fully accounts for the 3D volume of both microfibrils and cross-

615 links B) BEAM is a simplified approach based on Timoshenko beam mechanical theory (C)

616 NETMAT is similar to NET, with an added a matrix in between the fibers and (D) MAT, which

617 is similar to NETMAT but does not contain inter-microfibrillar cross-connectors.

618

619

620 Suppl. Figure 2

621

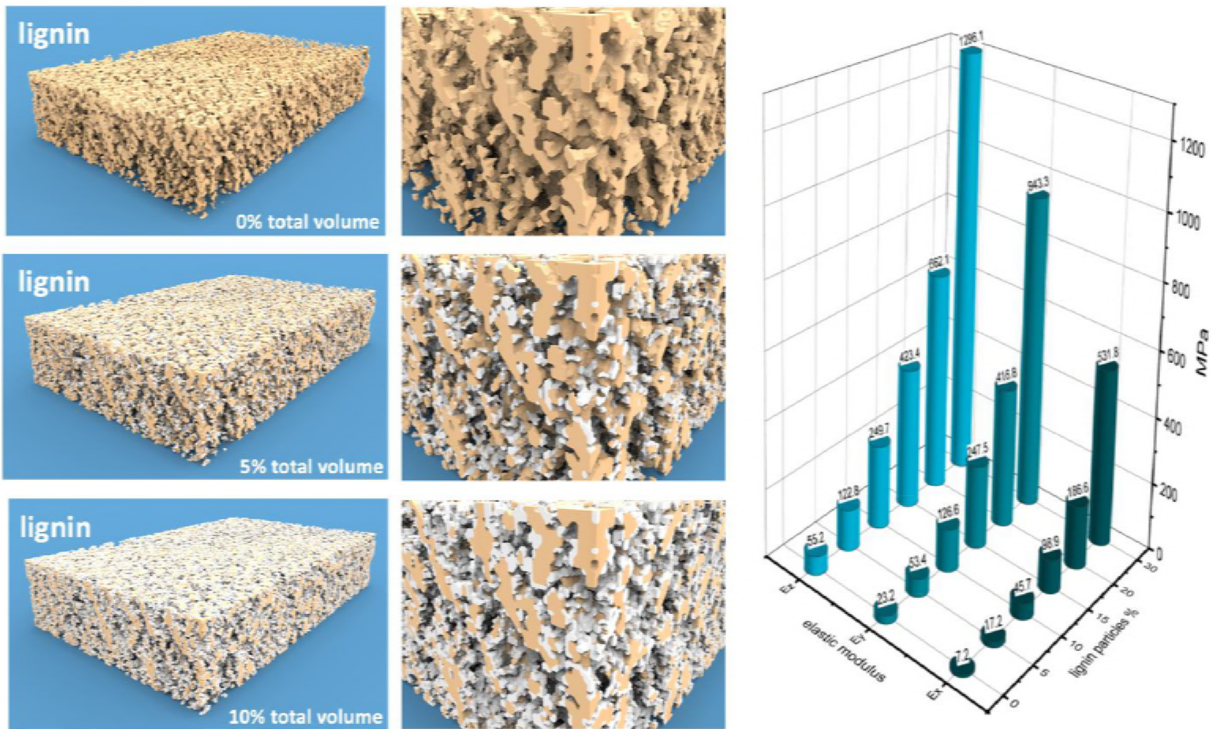

622

623

624 **Fig S2.** Modeling of lignin distribution in secondary cell wall (A, D) Secondary cell wall with an  
625 assumed 0% lignin. 20% of the total volume available is occupied by the cellulose/hemicellulose  
626 network. (A) overview (D) close-up detail. (B, E) 5% total volume of lignin (equivalent to a 15-  
627 20% dry weight) is added to the segmented map displayed in A. (B) overview and (E) close-up  
628 detail reveal vast amount of space remains unoccupied, inconsistent with a dense matrix in which  
629 microfibrils are embedded and thus mechanically connected. Increasing the lignin to 10% of total  
630 volume (resulting in a ~30-35% dry weight) leads to much more densely connected network,  
631 which is consistent with a matrix at these much higher lignin content. (C) overview (F) close-up  
632 detail. Note that the corresponding dry-weight is an estimate making assumptions on similarity in

633 density of lignin and cellulose/hemicellulose matrix. (G) Comparison of elastic moduli for radial  
634 (Er), tangential (Et) and longitudinal (EL) force loading.

635

636

637

638 Suppl. Figure 3

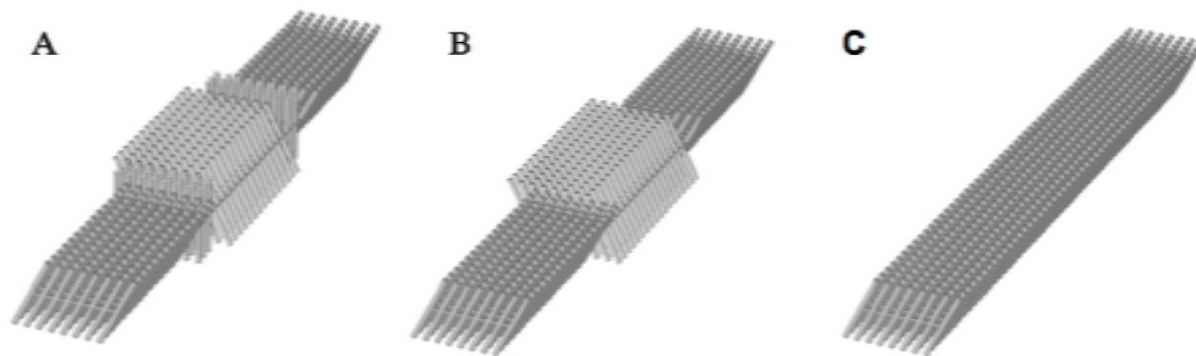

639

640 **Fig S3.** Hypothetical XTE cell wall models with varying supramolecular organization. A) Cell  
641 wall model with 15 microfibril layers each in the S1, S2 and S3 SCW that were inclined minus  
642 27°, plus 27° and minus 27°, respectively, and that were separated from each other by a 3  
643 microfibril layer transition zone with axial microfibril orientation. B) Cell wall model without  
644 transition zones, and 18 layers of microfibrils that are minus/plus/minus 27° inclined. C) All  
645 microfibrils (54 layers) are all inclined by 27°.

646
